# Supplementary material for: Tick Densities and Infection Prevalence on Coastal Islands in Massachusetts, USA: Establishing a Baseline
Source: MDPI journal article supplement (doi:10.3390/insects14070628), 2023-07-12

**Figure S1. Maps and habitat photos for the 12 study sites.**

| Latitude and longitude are listed for the beginning of each trail. |                                                        |                   |                   |                   |
|--------------------------------------------------------------------|--------------------------------------------------------|-------------------|-------------------|-------------------|
| Site                                                               | Property owner                                         | Trail length (km) | Latitude          | Longitude         |
| Stump Pond                                                         | Nantucket Land Bank, Nantucket Conservation Foundation | 0.96              | 41° 17' 13.184" N | 69° 59' 43.139" W |
| UMass Field Station                                                | Nantucket Conservation Foundation                      | 0.54              | 41° 17' 33.409" N | 70° 2' 20.123" W  |
| Norwood Farm                                                       | Nantucket Conservation Foundation                      | 0.94              | 47° 17' 25.567" N | 70° 1' 26.811" W  |
| Jewel Pond                                                         | Mass Audubon Society                                   | 0.94              | 41° 17' 19.029" N | 69° 59' 27.947" W |
| Tuckernuck Island                                                  | Tuckernuck Land Trust, private property                | 1.65              | 41° 18' 13.827" N | 70° 15' 23.997" W |
| Pine Woods – Lover’s Lane                                          | Commonwealth of MA                                     | 0.50              | 41° 15' 38.205 N  | 70° 4' 47.223" W  |
| Pine Woods – Water Tower                                           | Commonwealth of MA                                     | 0.64              | 41° 16' 37.853" N | 70° 4' 15.578" W  |
| South Pasture                                                      | Nantucket Conservation Foundation                      | 1.10              | 41° 15' 6.790" N  | 70° 0' 42.788" W  |
| Barrett Farm Road                                                  | Nantucket Land Bank                                    | 0.78              | 41° 16' 51.682" N | 70° 8' 42.164" W  |
| Linda Loring                                                       | Linda Loring Foundation                                | 1.50              | 41° 17' 32.323" N | 70° 10' 11.418" W |
|                                                                    |                                                        |                   |                   |                   |
| Long Pond (lone star ticks)                                        | Nantucket Land Bank                                    | 1.4               | 41° 15' 54.623" N | 70° 9' 51.466" W  |
| Clark’s Cove (lone star ticks)                                     | Nantucket Conservation Foundation                      | 0.4               | 41° 16' 19.079" N | 70° 10' 53.758" W |
|                                                                    |                                                        |                   |                   |                   |

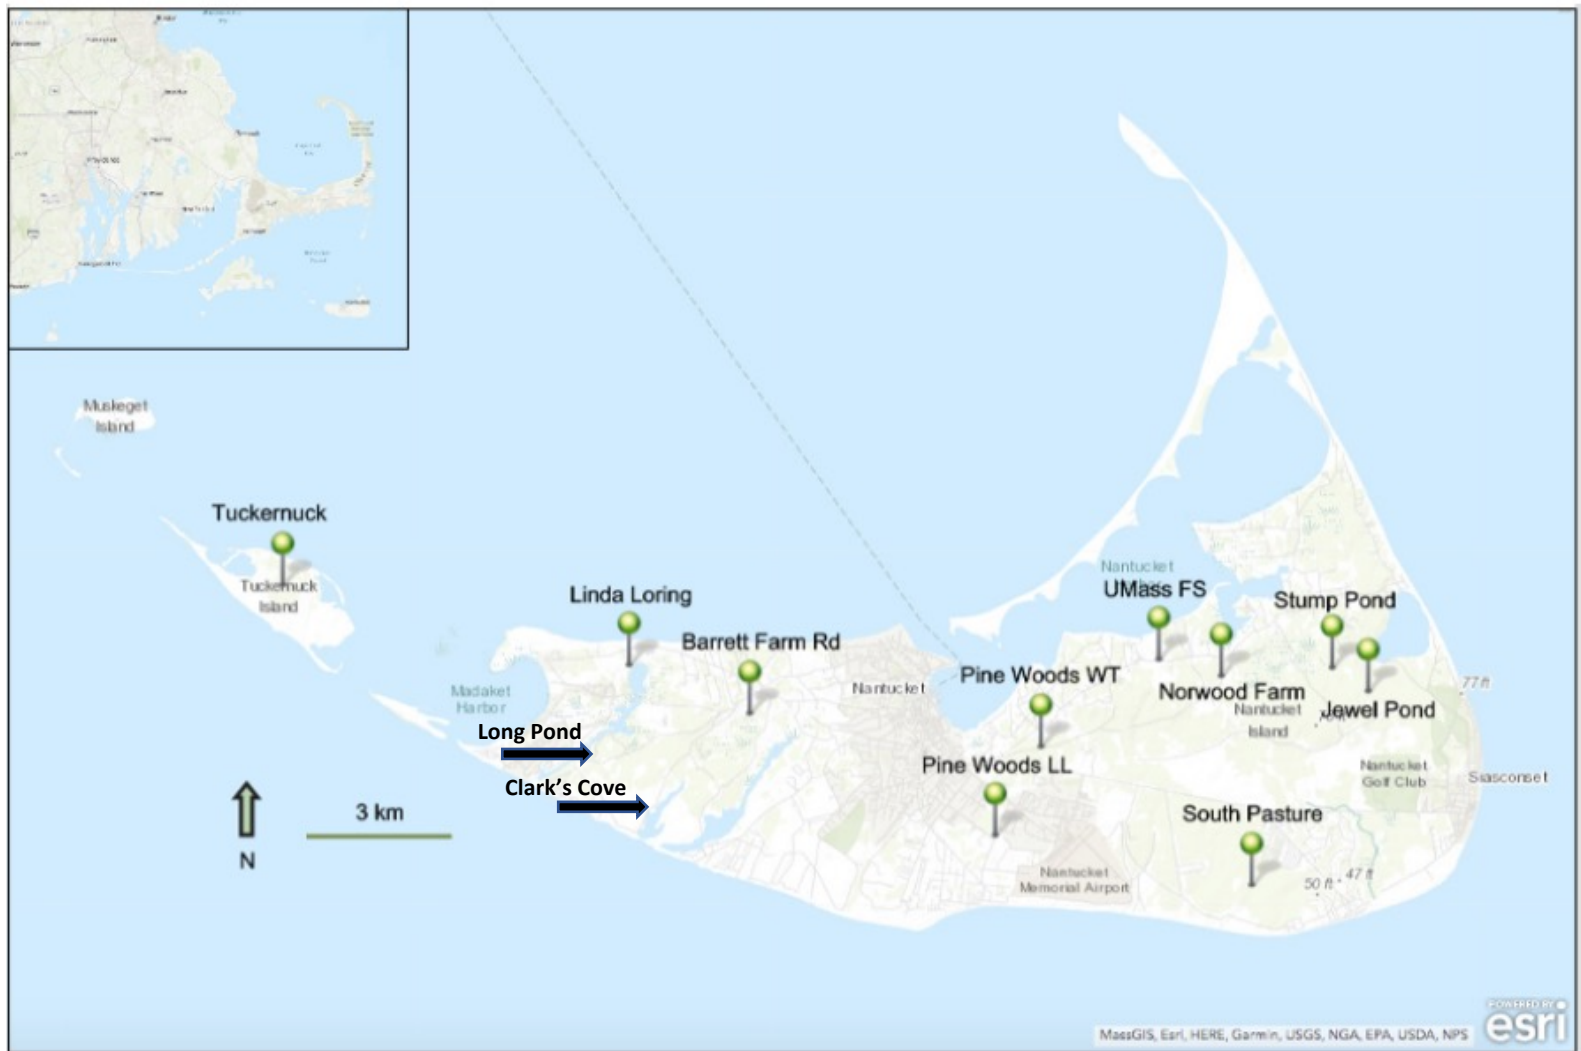



## Tuckernuck Site (trail is divided into nearby sections)

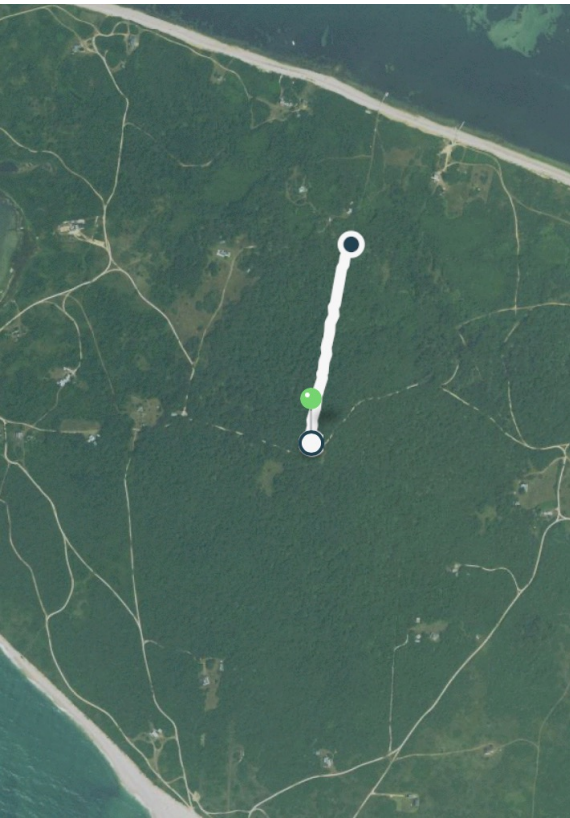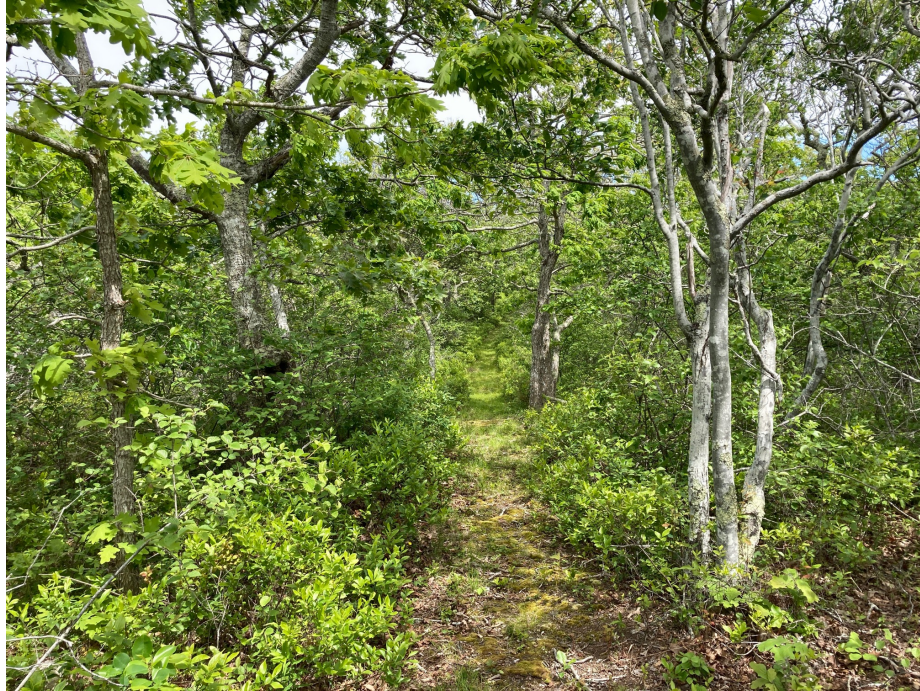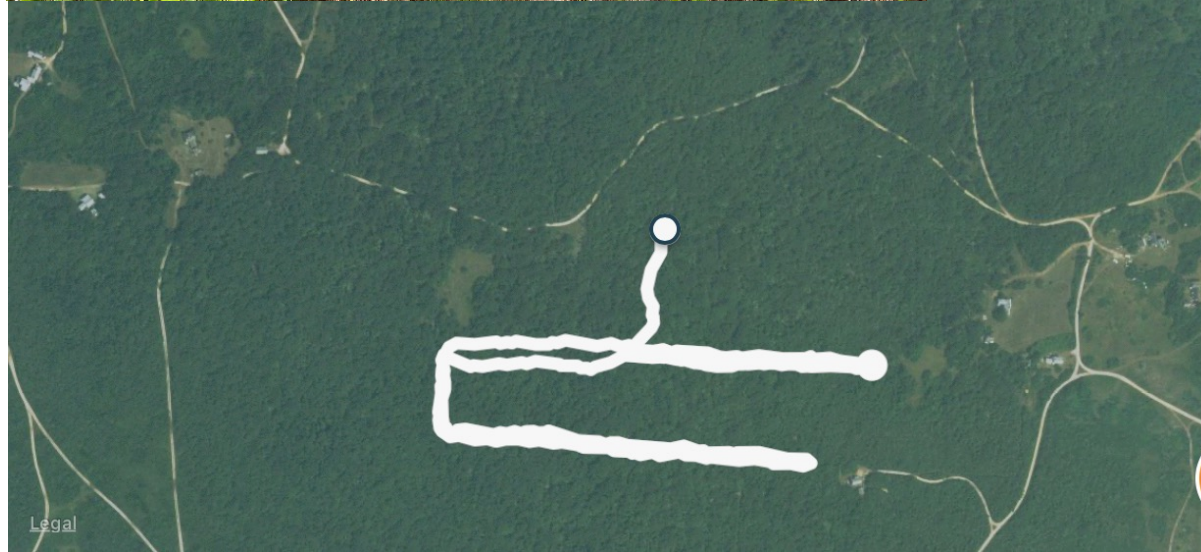



**Stump Pond Site** – access is via 345 Polpis Rd.

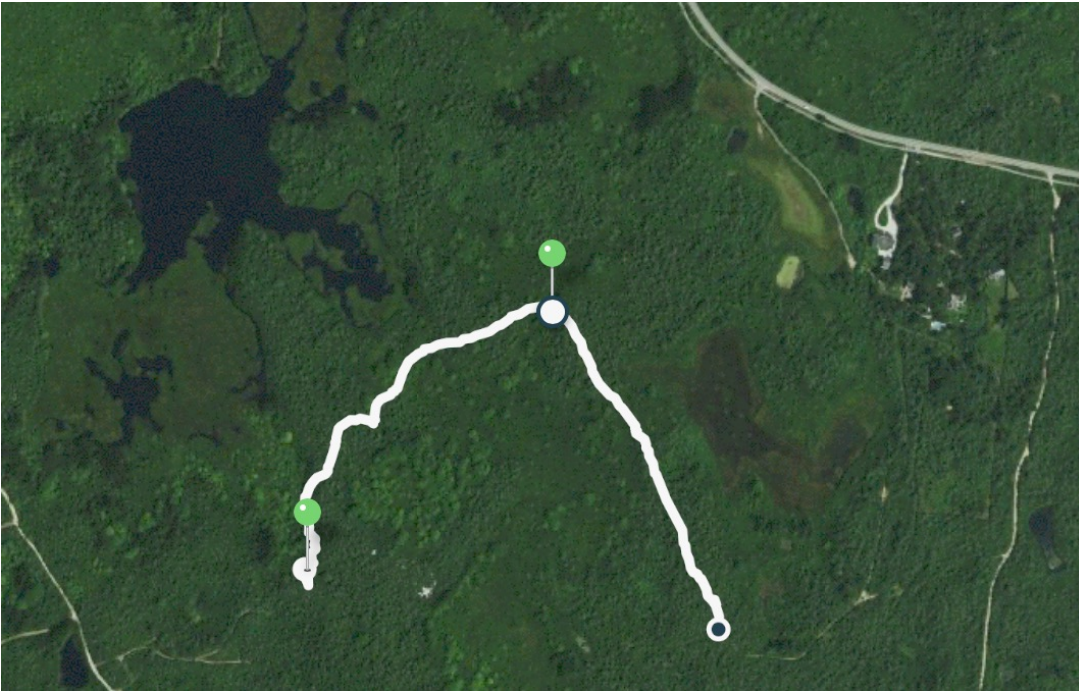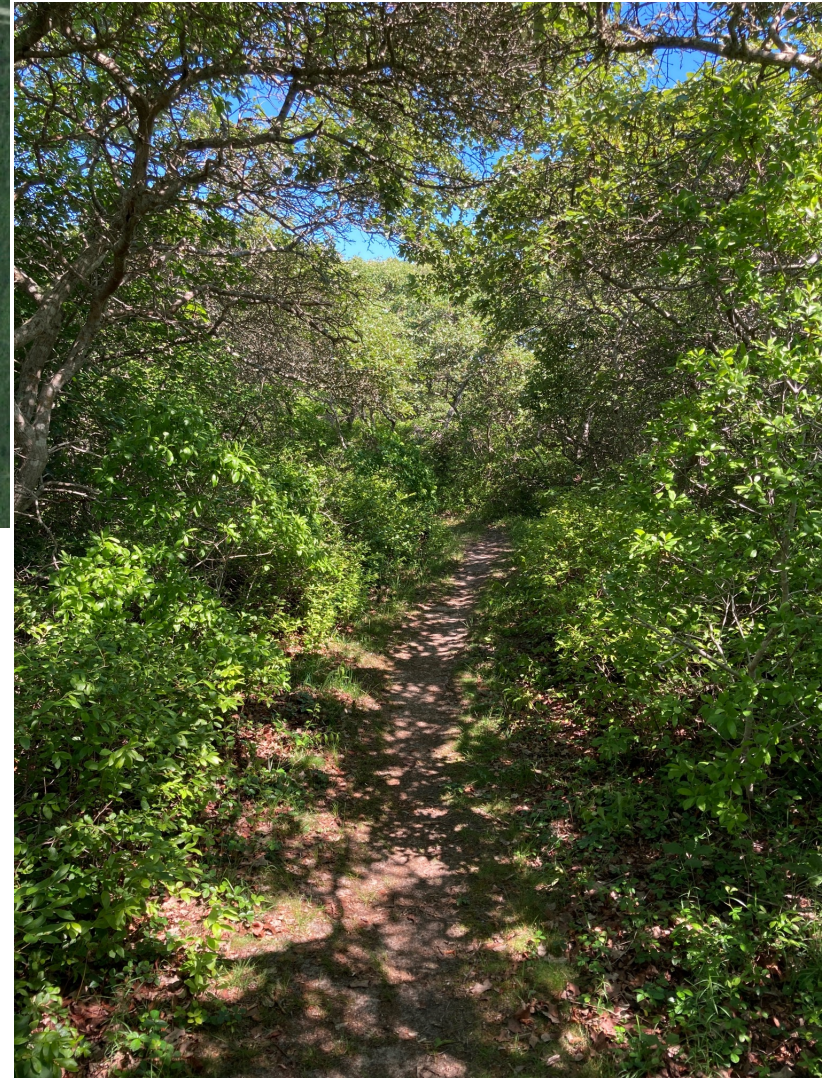



## UMass Field Station Site – access at 180 Polpis Rd.

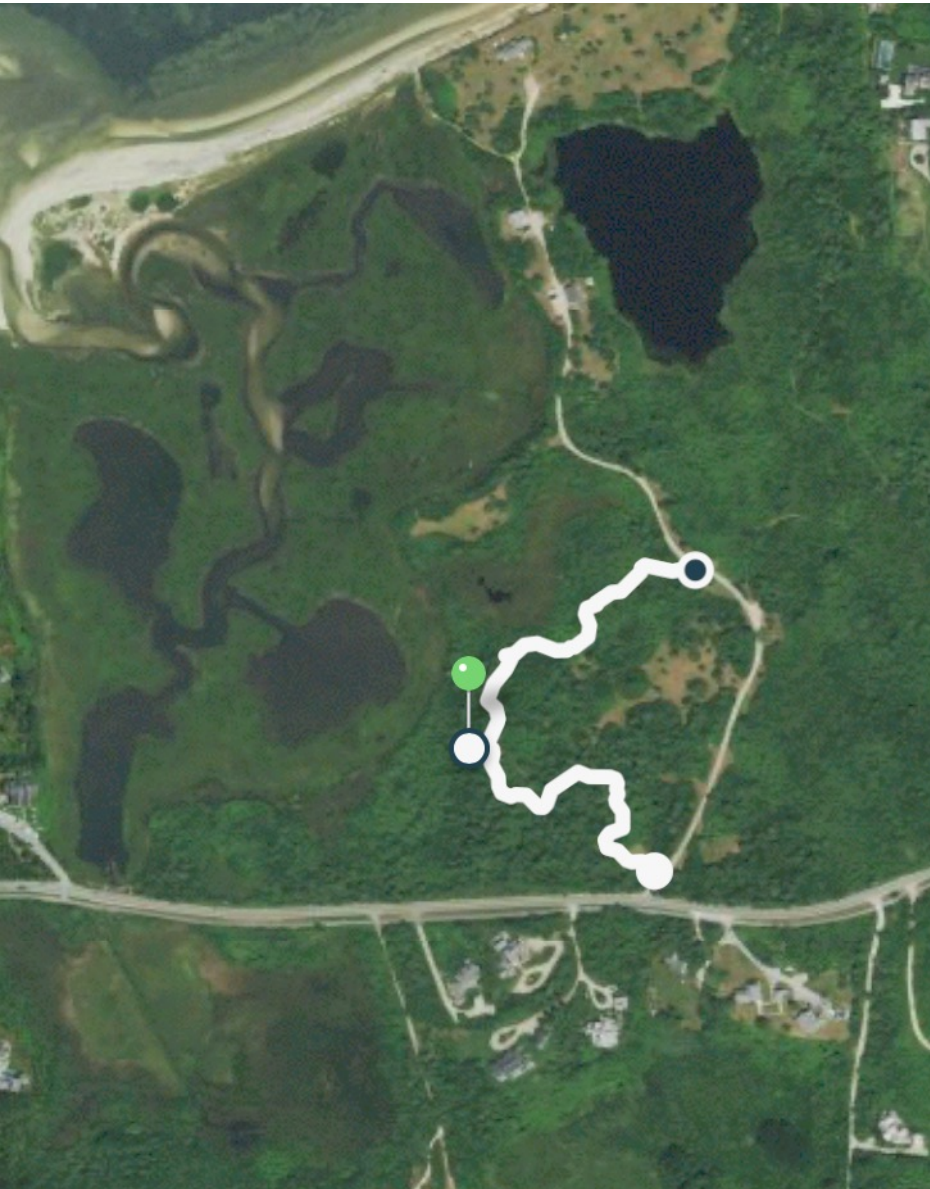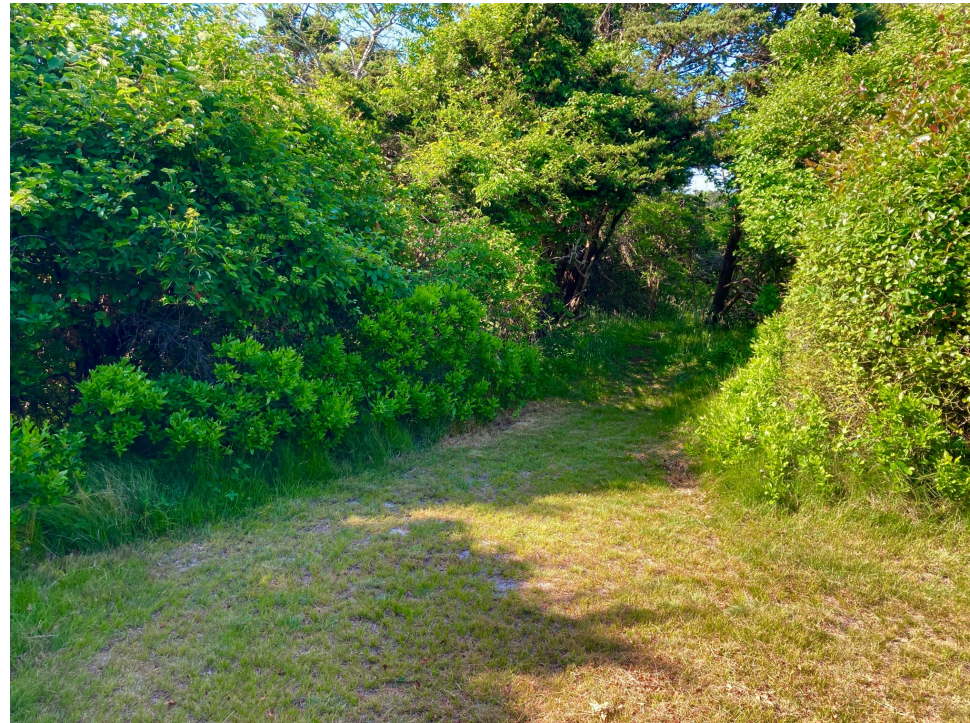



## Norwood Farm Site – Old Polpis Rd.

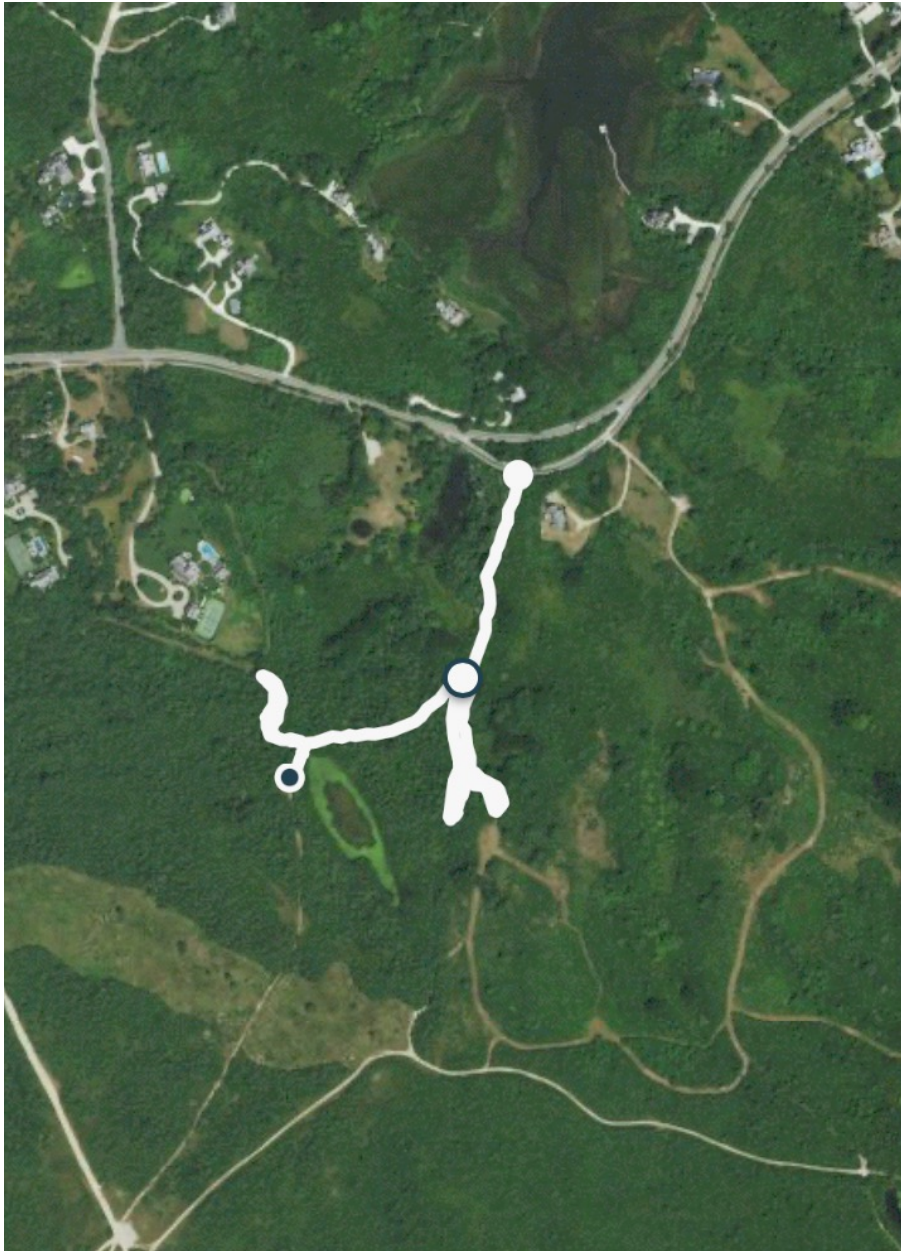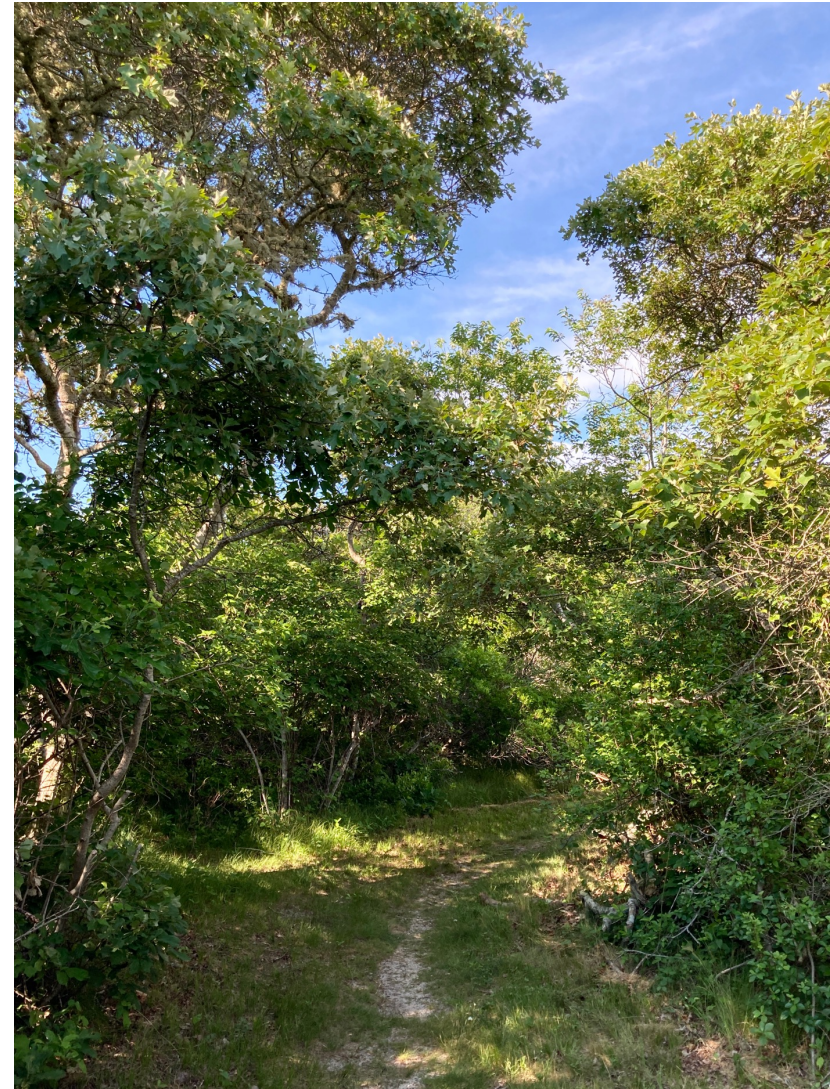



## Jewel Pond Site – access via 345 Polpis Rd.

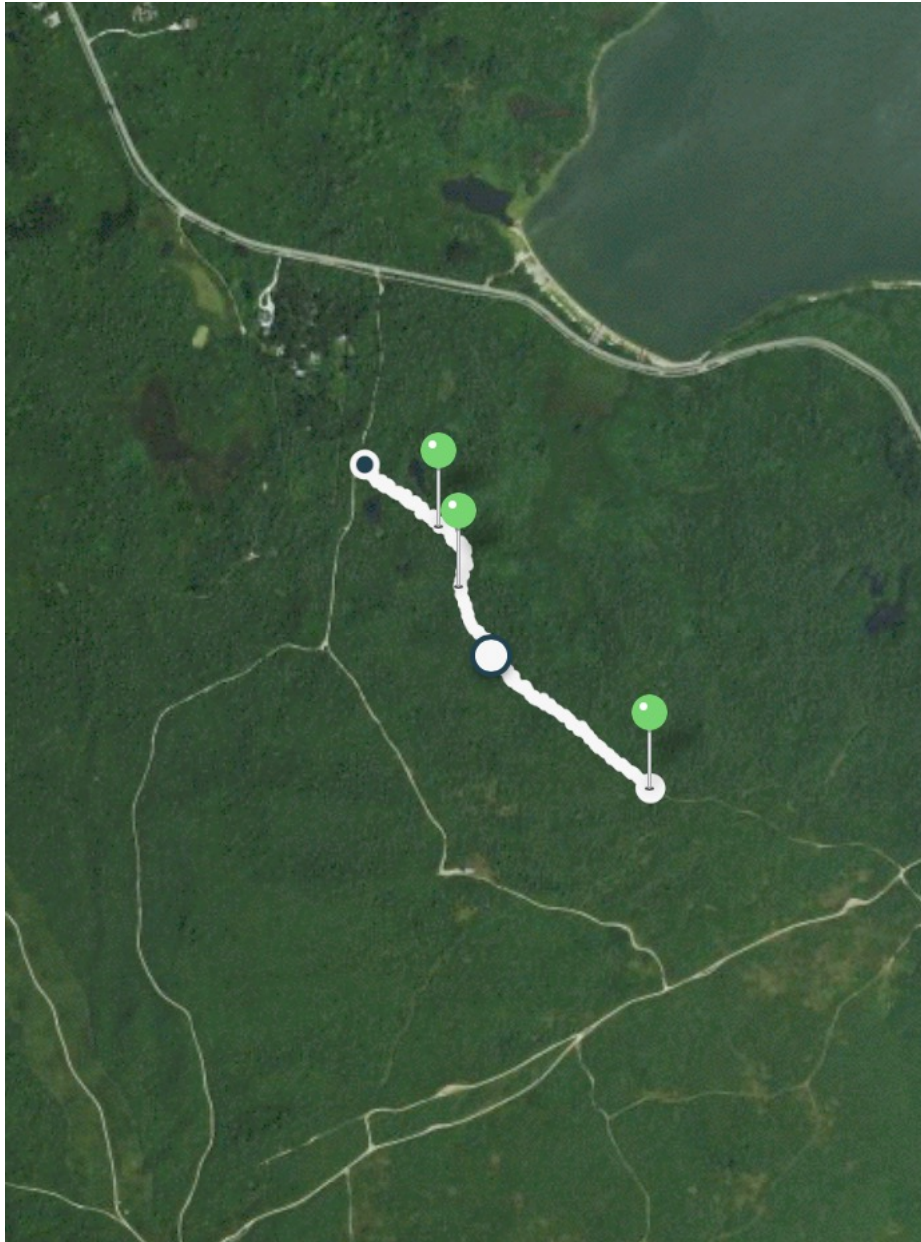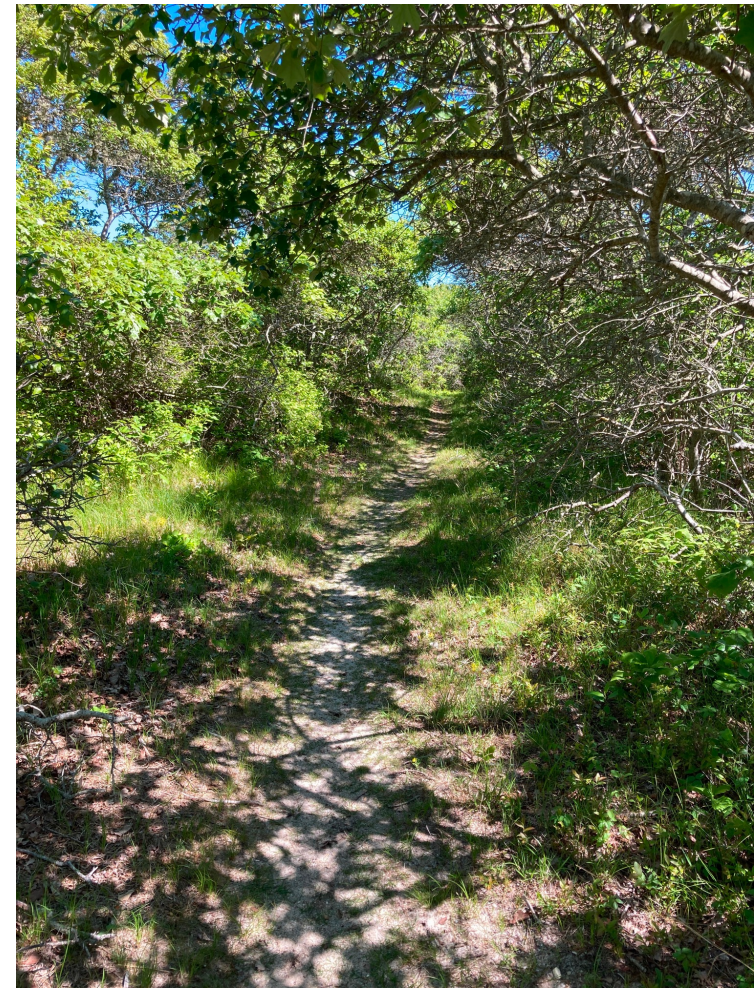



**Pine Woods, Lovers Lane Site** – corner of Rugged Rd and Lovers Lane.

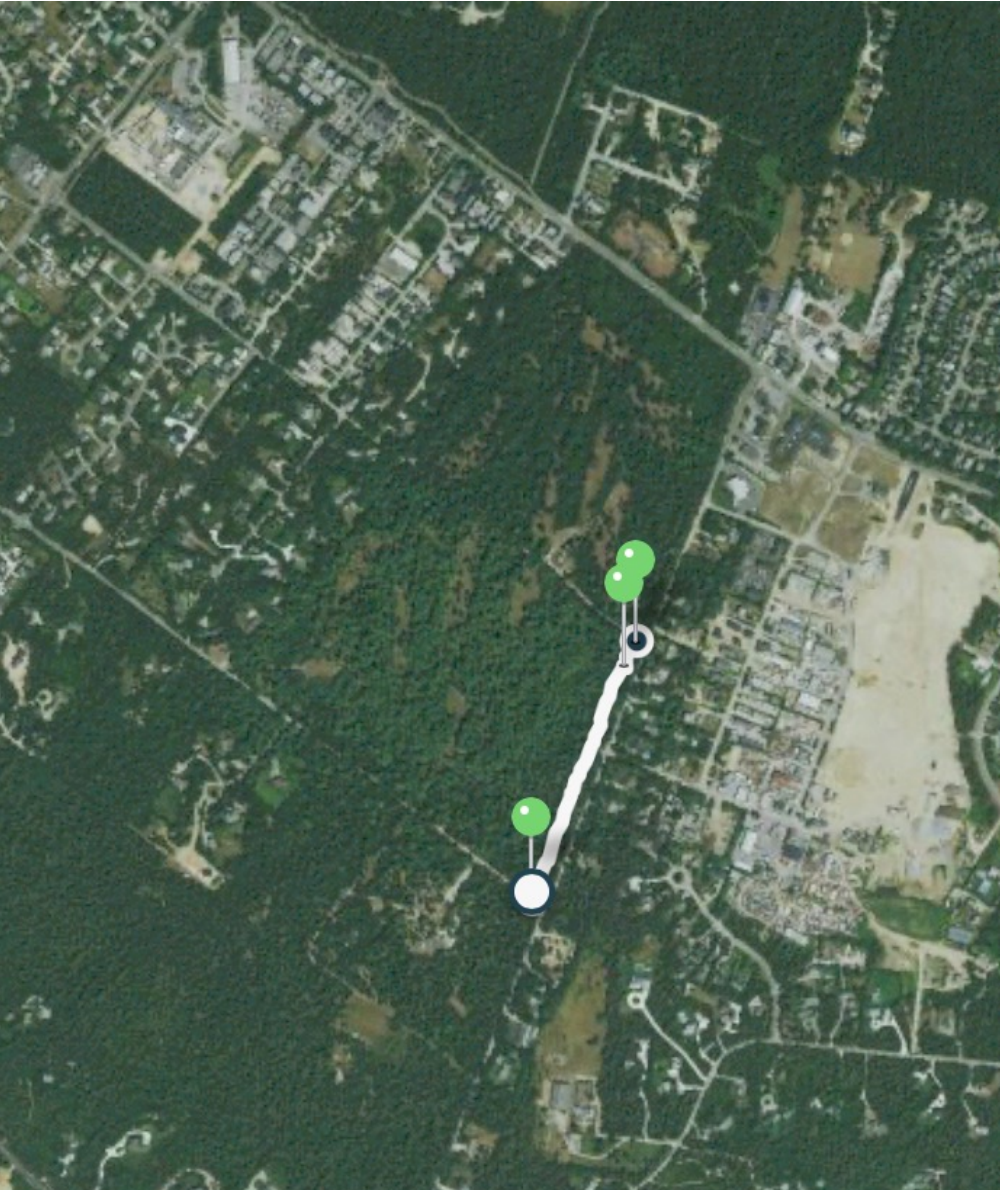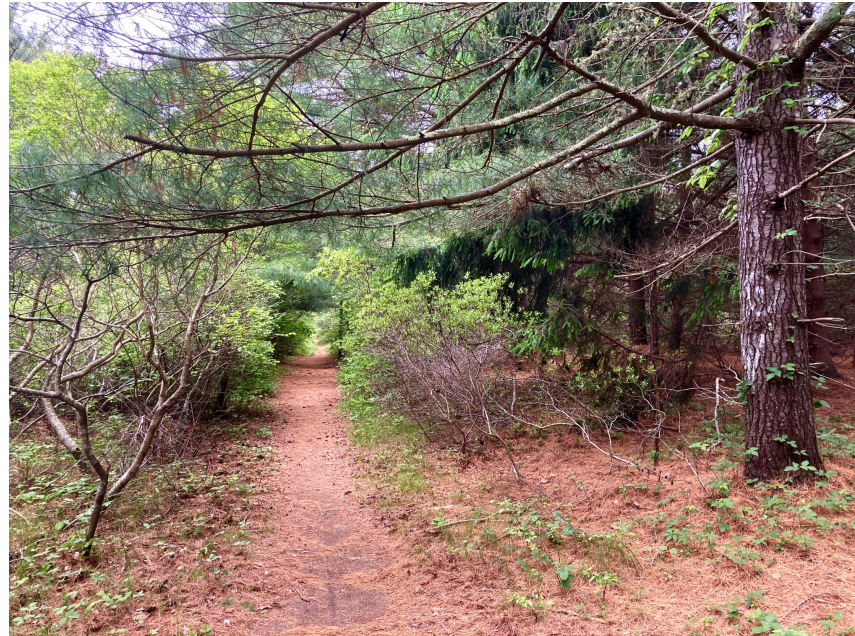



**Pine Woods, Water Tower Site – off Polpis Rd.**

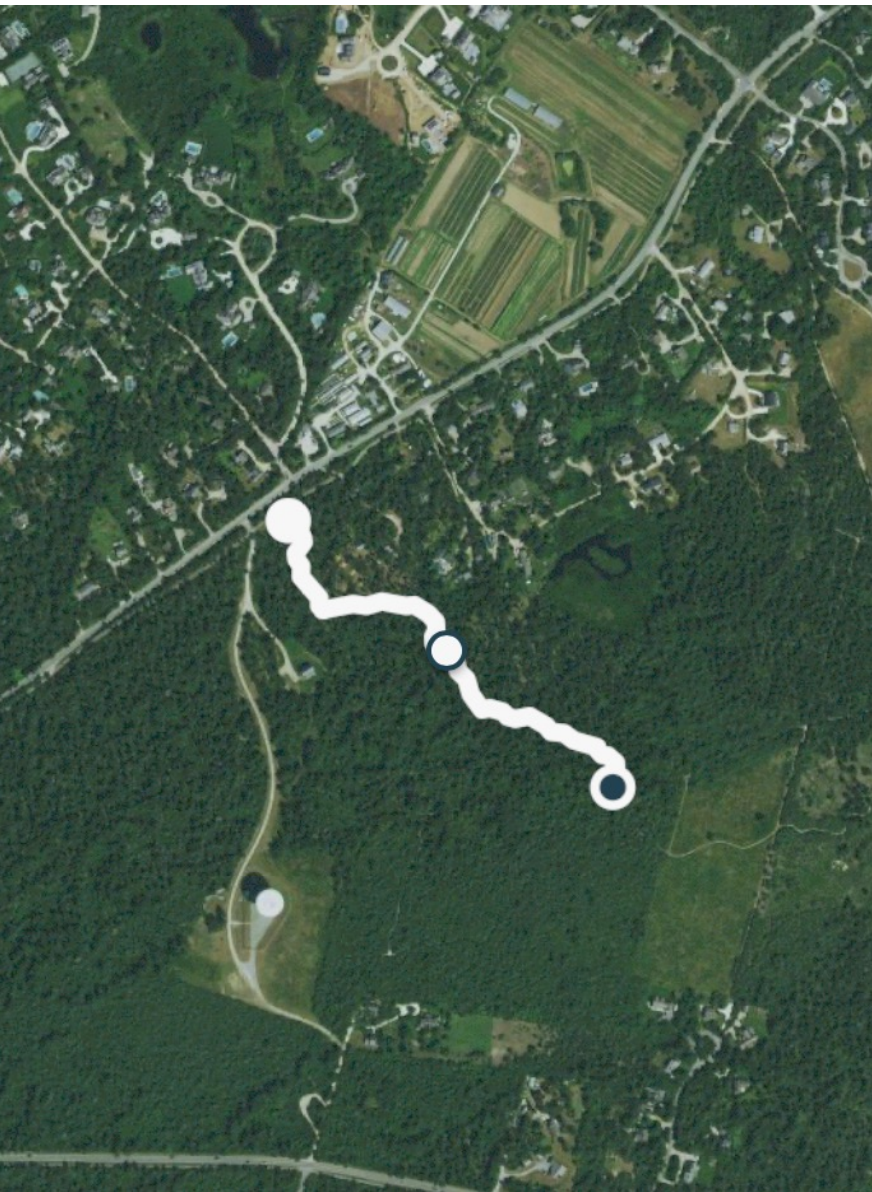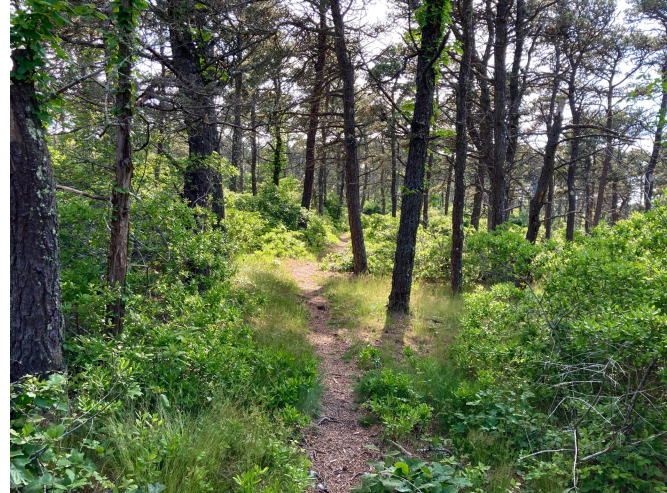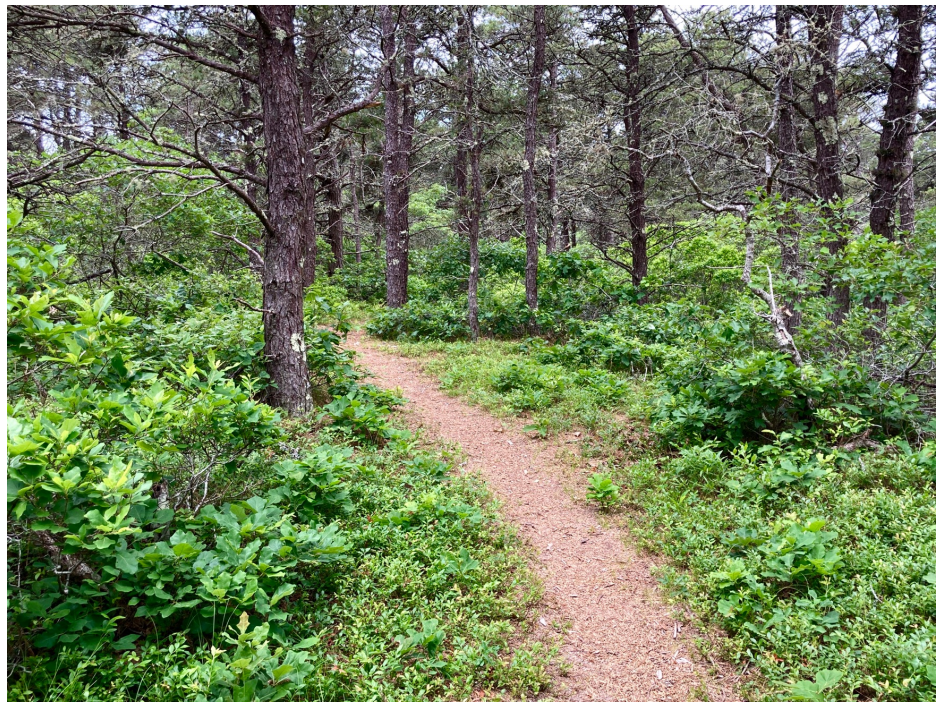



## South Pasture Site – off corner of Gloucester St.

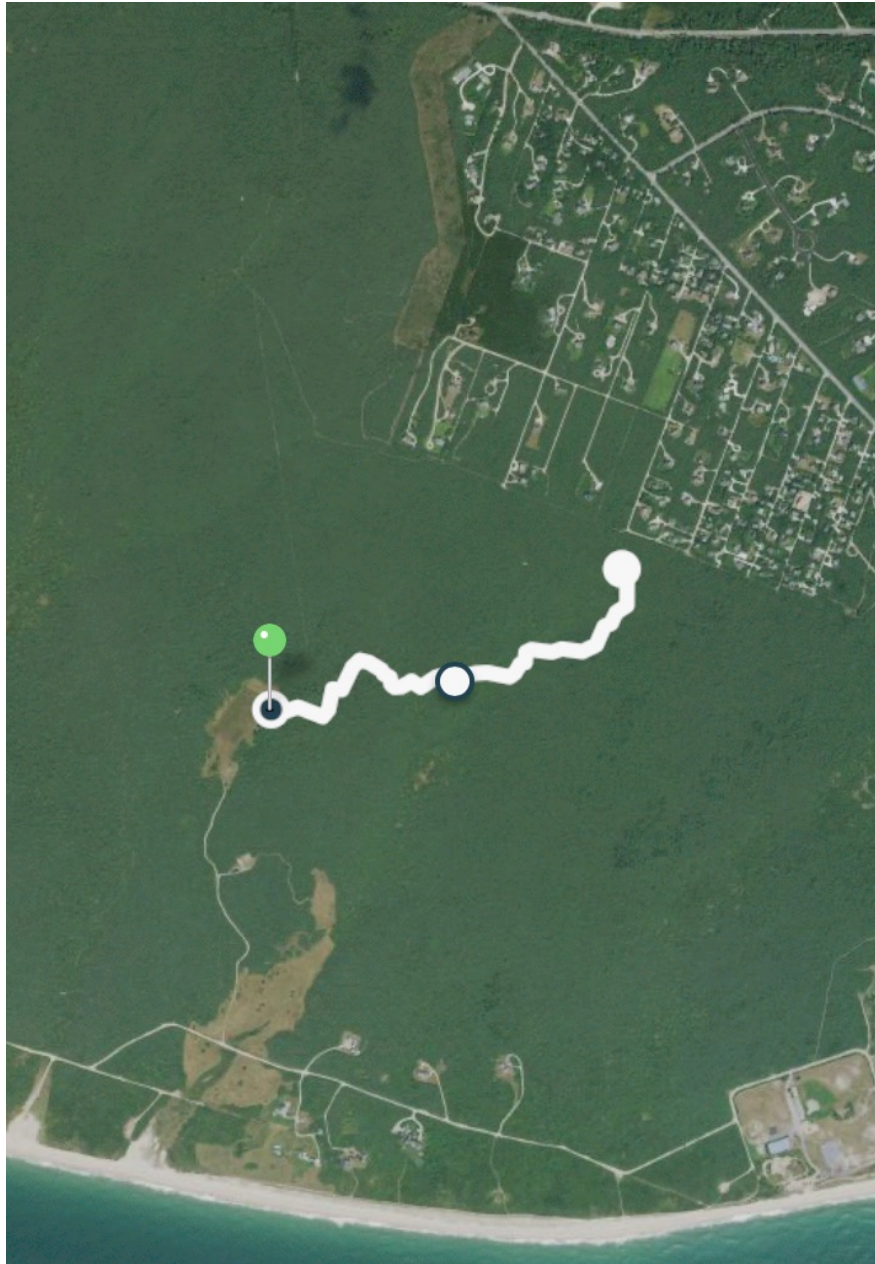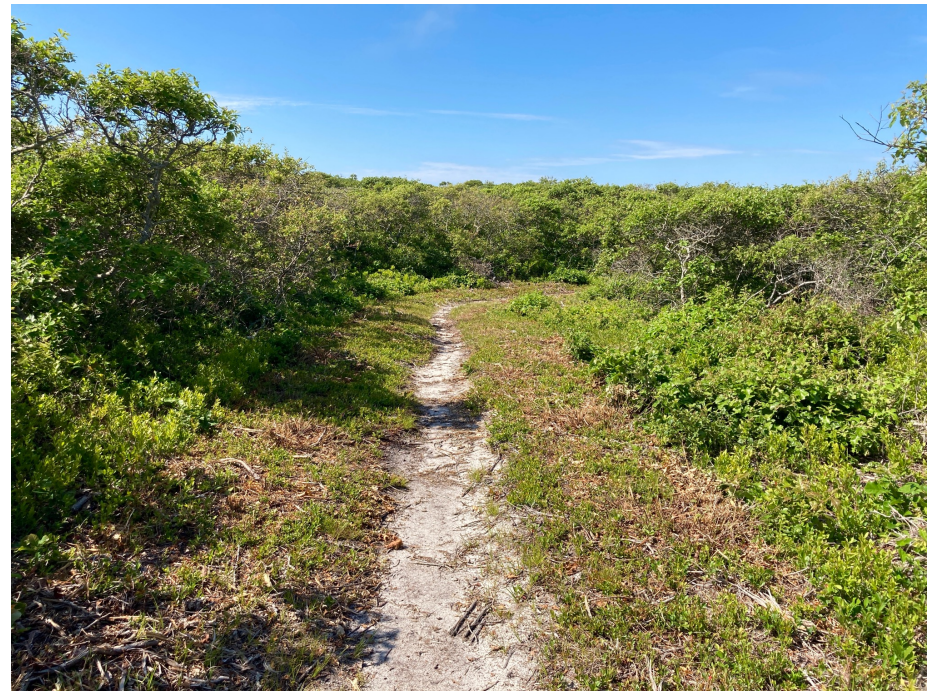



**Barrett Farm Road Site – Barrett Farm Rd. near Madaket Rd.**

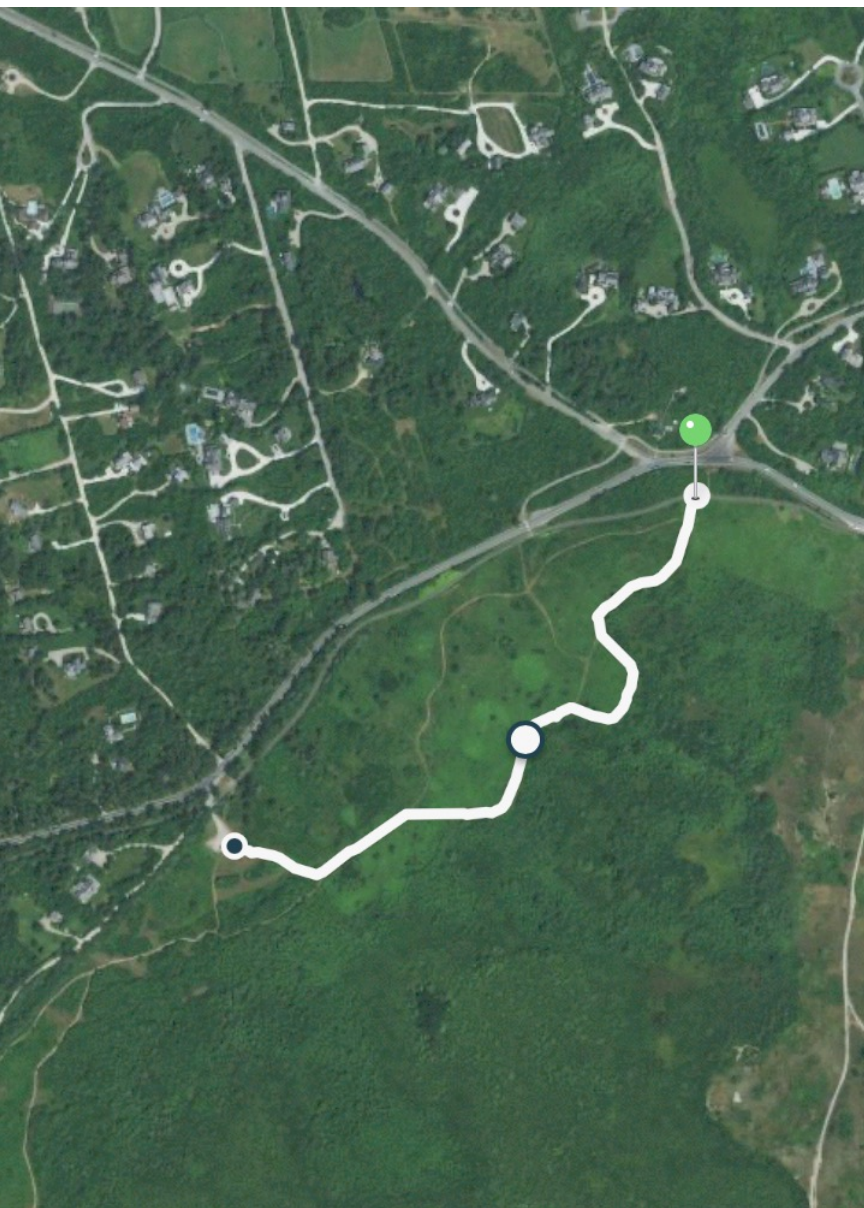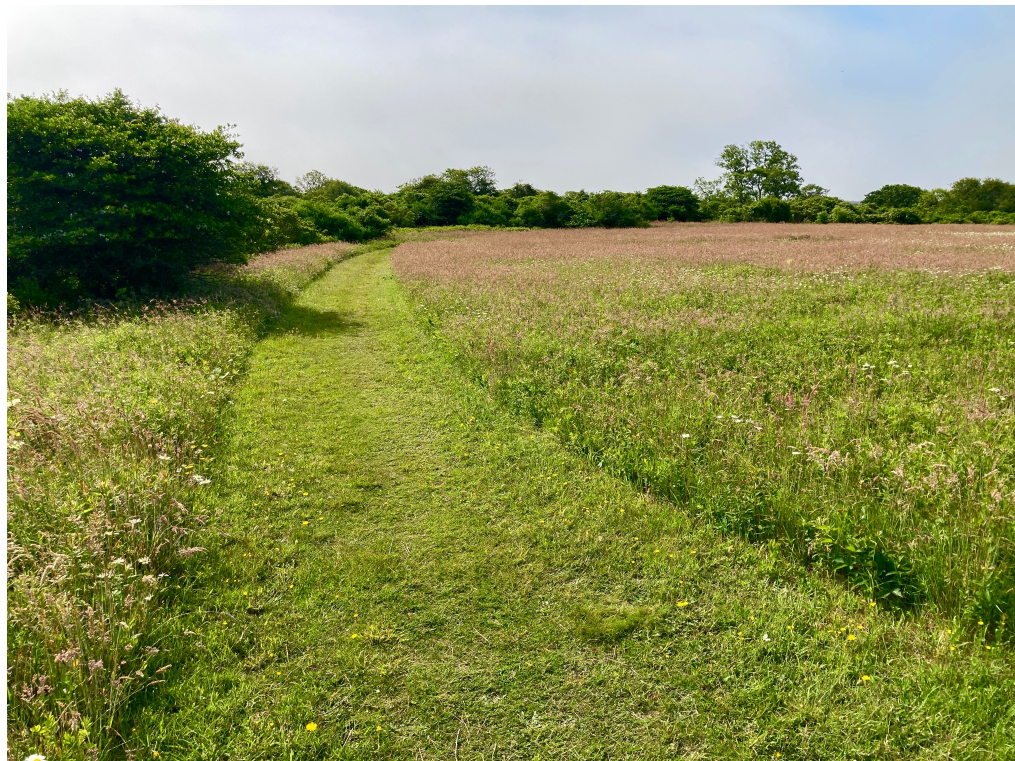



## Linda Loring Site – 110 Eel Point Rd.

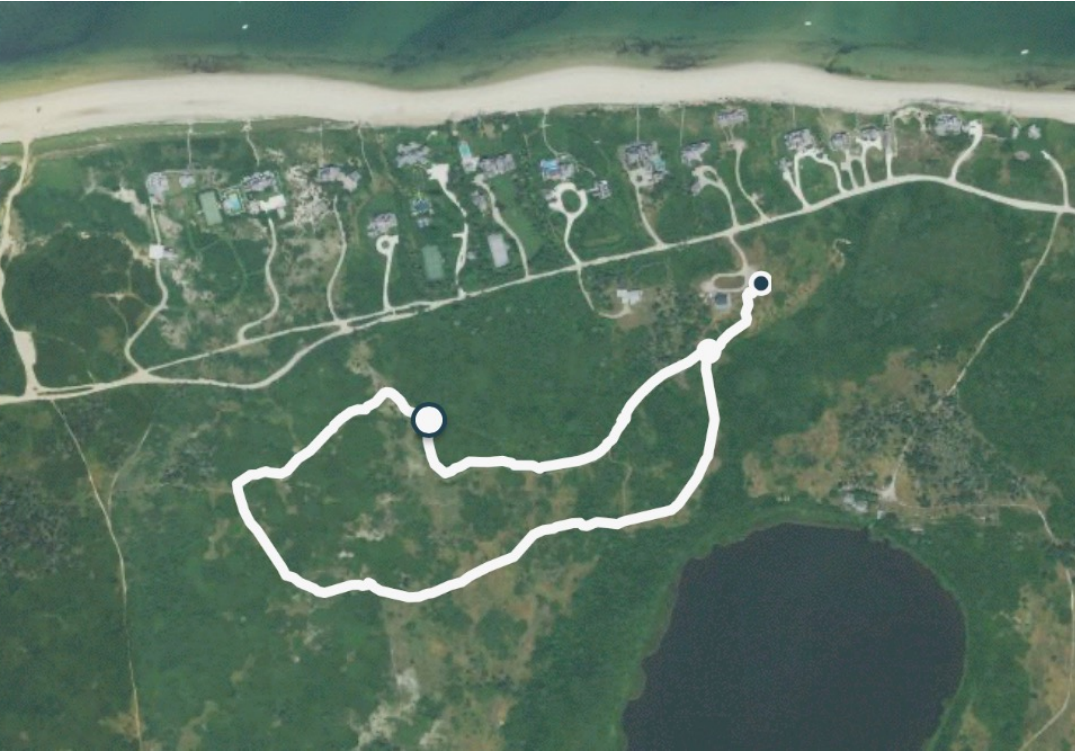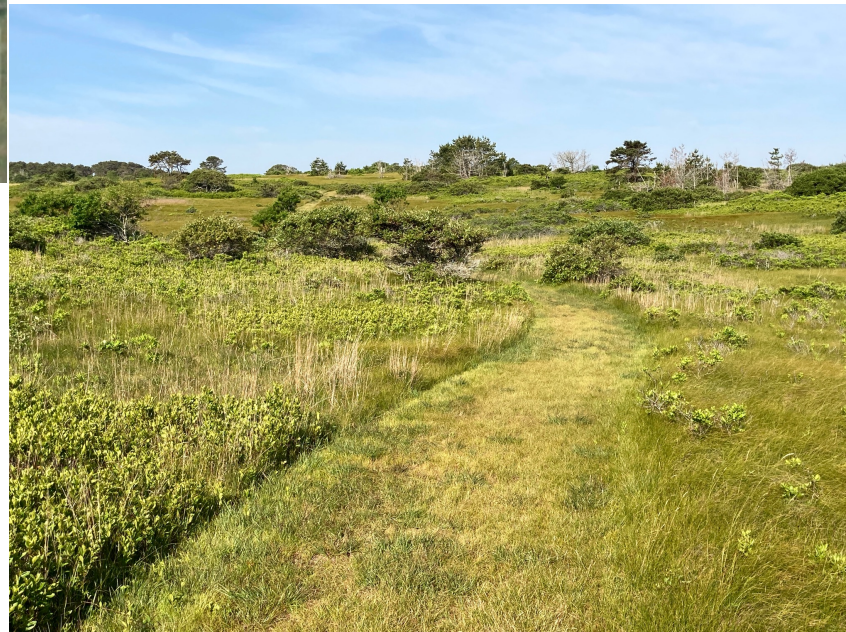



**Long Pond (lone star site)**

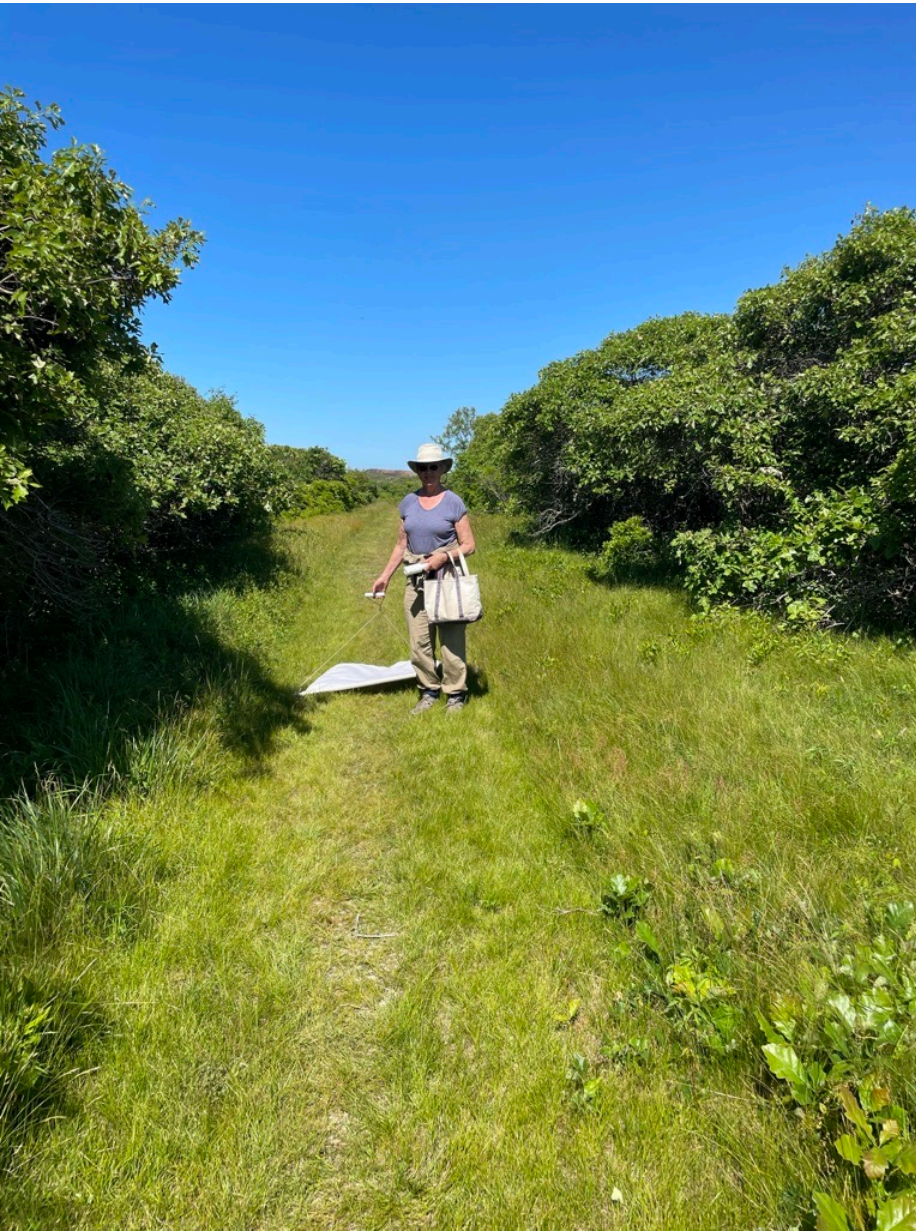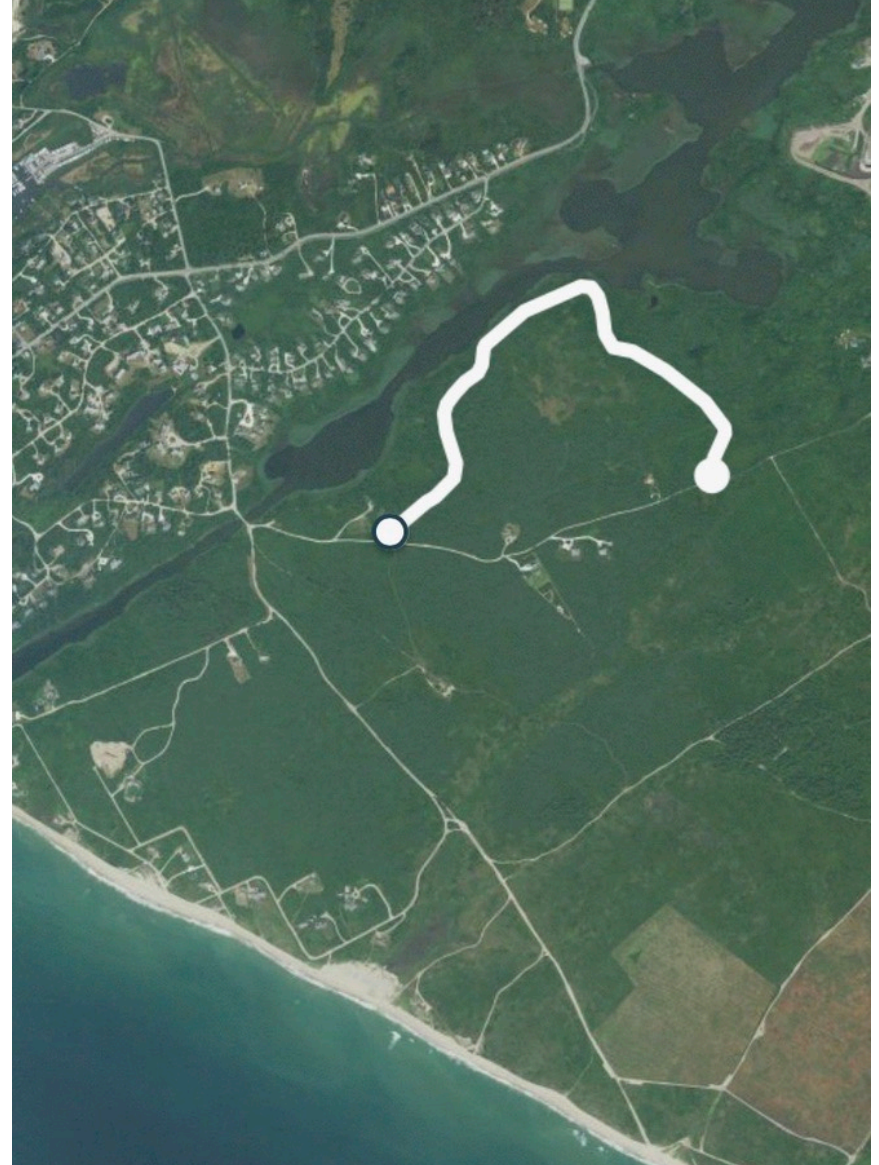



## Clark's Cove (lone star site)

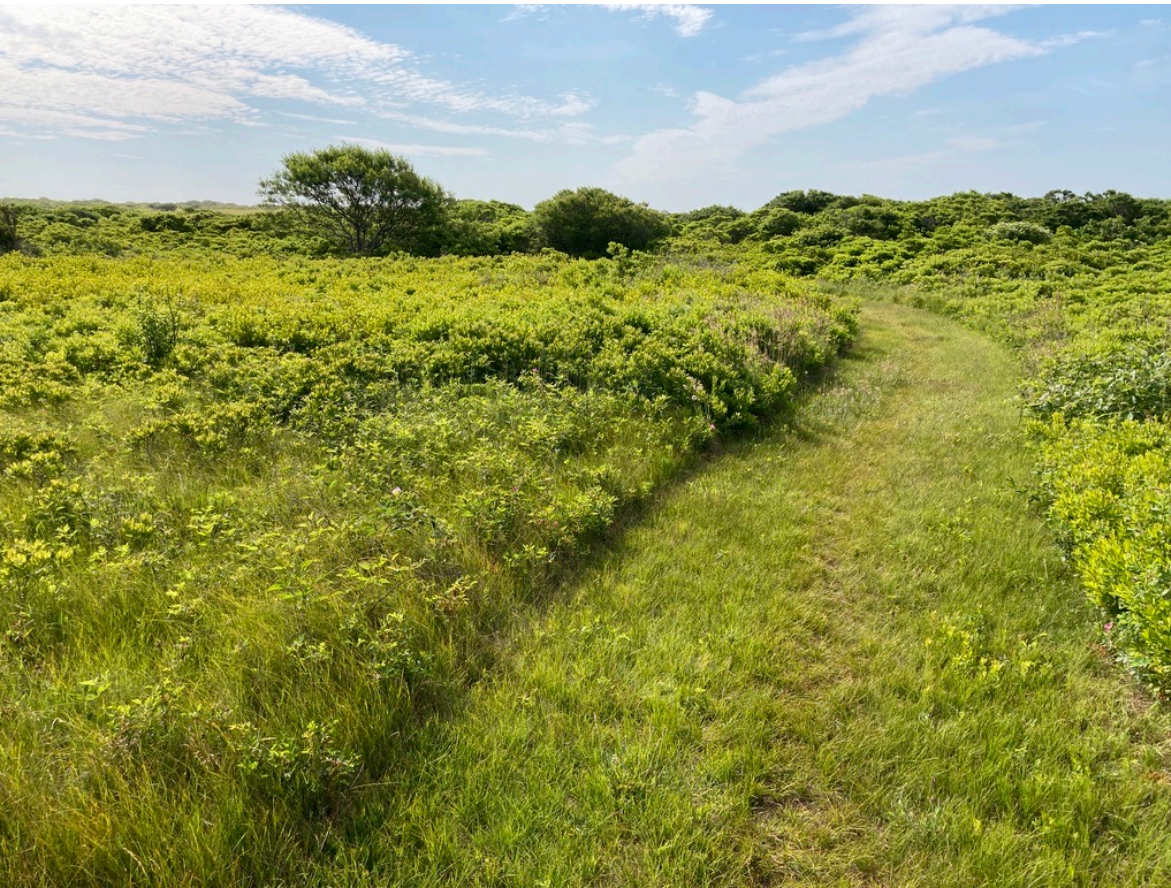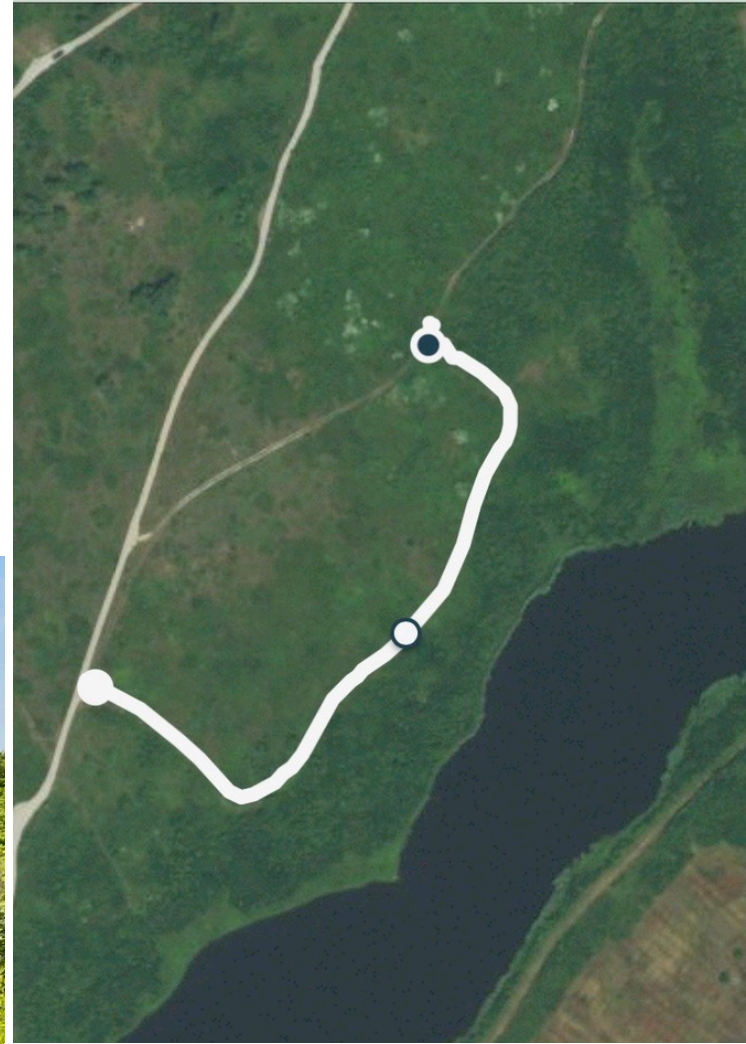

Supplement: s1 [file s1]
