# Supplementary material for: Tick Densities and Infection Prevalence on Coastal Islands in Massachusetts, USA: Establishing a Baseline
Source: MDPI journal article supplement (doi:10.3390/insects14070628), 2023-07-12
Supplement: s1 [file s1]

Supplementary Table S3. Frequency and infection status of *Ixodes dentatus* nymphs collected at study sites on Nantucket and Tuckernuck islands in 2020 and 2021. All other *Ixodes* nymphs were *I. scapularis*. Pathogen abbreviations are Bb (*Borrelia burgdorferi*), Bm (*Babesia microti*), Ap (*Anaplasma phagocytophilum*).

| Location         | Year | Total <i>Ixodes</i> nymphs collected | Number <i>I. dentatus</i> | Percent <i>I. dentatus</i> | Number <i>I. dentatus</i> with at least one pathogen | Number <i>I. dentatus</i> with Bb only | Number <i>I. dentatus</i> with Ap only | Number <i>I. dentatus</i> with Bm only | Number <i>I. dentatus</i> with Bb + Bm |
|------------------|------|--------------------------------------|---------------------------|----------------------------|------------------------------------------------------|----------------------------------------|----------------------------------------|----------------------------------------|----------------------------------------|
| <b>Nantucket</b> |      |                                      |                           |                            |                                                      |                                        |                                        |                                        |                                        |
| Stump Pond       | 2020 | 454                                  | 6                         | 1.3                        | 0                                                    | 0                                      | 0                                      | 0                                      | 0                                      |
| Stump Pond       | 2021 | 399                                  | 1                         | 0.3                        | 0                                                    | 0                                      | 0                                      | 0                                      | 0                                      |
|                  |      |                                      |                           |                            |                                                      |                                        |                                        |                                        |                                        |
| UMass Field Stn  | 2020 | 423                                  | 25                        | 5.9                        | 1                                                    | 1                                      | 0                                      | 0                                      | 0                                      |
| UMass Field Stn  | 2021 | 457                                  | 45                        | 9.9                        | 11                                                   | 9                                      | 1                                      | 0                                      | 1                                      |
|                  |      |                                      |                           |                            |                                                      |                                        |                                        |                                        |                                        |
| Norwood Farm     | 2020 | 374                                  | 36                        | 9.6                        | 3                                                    | 2                                      | 0                                      | 1                                      | 0                                      |
| Norwood Farm     | 2021 | 477                                  | 19                        | 4                          | 3                                                    | 1                                      | 0                                      | 2                                      | 0                                      |
|                  |      |                                      |                           |                            |                                                      |                                        |                                        |                                        |                                        |
| Jewel Pond       | 2020 | 437                                  | 7                         | 1.6                        | 0                                                    | 0                                      | 0                                      | 0                                      | 0                                      |
| Jewel Pond       | 2021 | 415                                  | 0                         | 0                          | 0                                                    | 0                                      | 0                                      | 0                                      | 0                                      |
|                  |      |                                      |                           |                            |                                                      |                                        |                                        |                                        |                                        |
| Tuckernuck       | 2020 | 332                                  | 2                         | 0.3                        | 2                                                    | 2                                      | 0                                      | 0                                      | 0                                      |
| Tuckernuck       | 2021 | 444                                  | 0                         | 0                          | 0                                                    | 0                                      | 0                                      | 0                                      | 0                                      |
