# Supplementary material for: Tick Densities and Infection Prevalence on Coastal Islands in Massachusetts, USA: Establishing a Baseline
Source: MDPI journal article supplement (doi:10.3390/insects14070628), 2023-07-12
Supplement: s1 [file s1]

**Supplementary Table 2A.** Frequency of tree canopy species with branches over the trail at 10 study sites. Percent occurrence is shown (N = number of sample points); blank cells represent zero percent. When >1 tree species is present at a sample point, percent occurrence values for each site may sum to >100%. Sample points were spaced at regular intervals along each trail.

|                             | <b>Sentinel<br/>Sites:</b> | Stump<br>Pond | UMass<br>Field<br>Station | Nor-<br>wood<br>Farm | Jewel<br>Pond | Tucker<br>-nuck | Pine<br>Woods<br>LL | Pine<br>Woods<br>WT | South<br>Pasture | Barrett<br>Farm<br>Road | Linda<br>Loring |
|-----------------------------|----------------------------|---------------|---------------------------|----------------------|---------------|-----------------|---------------------|---------------------|------------------|-------------------------|-----------------|
|                             | N:                         | (60)          | (35)                      | (49)                 | (57)          | (102)           | (33)                | (45)                | (75)             | (55)                    | (110)           |
| <b>Species:</b>             | <b>Common<br/>names:</b>   |               |                           |                      |               |                 |                     |                     |                  |                         |                 |
| <i>Quercus spp.</i>         | all oak spp.               | 63            |                           | 37                   | 47            | 70              |                     | 2                   | 4                |                         |                 |
| <i>Quercus ilicifolia</i>   | scrub oak                  | 63            |                           | 27                   | 47            | 5               |                     | 2                   | 3                |                         |                 |
| <i>Prunus serotina</i>      | black cherry               | 8             | 6                         | 2                    | 5             | 8               | 6                   |                     |                  |                         |                 |
| <i>Acer rubrum</i>          | red maple                  | 2             |                           |                      |               |                 |                     |                     |                  |                         |                 |
| <i>Quercus alba</i>         | white oak                  |               |                           | 10                   |               | 33              |                     |                     |                  |                         |                 |
| <i>Quercus velutina</i>     | black oak                  |               |                           |                      |               | 44              |                     |                     |                  |                         |                 |
| <i>Sassafras albidum</i>    | sassafras                  |               |                           |                      |               | 8               |                     |                     |                  |                         |                 |
| <i>Juniperus virginiana</i> | red cedar                  |               | 9                         |                      |               |                 |                     |                     |                  |                         |                 |
| <i>Nyssa sylvatica</i>      | blackgum                   |               |                           | 6                    |               |                 |                     |                     |                  |                         |                 |
| <i>Pinus rigida</i>         | pitch pine                 |               |                           | 6                    |               |                 | 15                  | 51                  |                  |                         |                 |
| <i>Pinus strobus</i>        | white pine                 |               |                           |                      |               |                 | 39                  |                     |                  |                         |                 |

|                              |          |  |  |  |  |  |  |   |  |  |  |
|------------------------------|----------|--|--|--|--|--|--|---|--|--|--|
| <i>Populus grandidentata</i> | aspen    |  |  |  |  |  |  | 7 |  |  |  |
| <i>Amelanchier spp.</i>      | shadbush |  |  |  |  |  |  |   |  |  |  |
| <i>Crataegus monogyna</i>    | hawthorn |  |  |  |  |  |  |   |  |  |  |

**Supplementary Table 2B.** Frequency of common woody species and vines within 1m of the trail at 10 study sites.

Percent occurrence is shown if  $\geq 10\%$ ; blank cells represent  $< 10\%$ . Sample sizes as in Table S1A, above. Small oak saplings are included in the data set.

| Species                        | Common<br>name       | Stump<br>Pond | UMass<br>Field<br>Station | Nor-<br>wood<br>Farm | Jewel<br>Pond | Tucker-<br>nuck | Lost<br>Farm | Pine<br>Woods<br>LL | Pine<br>Woods<br>WT | South<br>Pasture | Barrett<br>Farm<br>Road | Linda<br>Loring |
|--------------------------------|----------------------|---------------|---------------------------|----------------------|---------------|-----------------|--------------|---------------------|---------------------|------------------|-------------------------|-----------------|
|                                |                      |               |                           |                      |               |                 |              |                     |                     |                  |                         |                 |
| <i>Quercus<br/>ilicifolia</i>  | scrub oak            | 92            |                           | 92                   | 91            | 19              | 34           | 97                  | 91                  | 100              |                         | 11              |
| <i>Gaylussacia<br/>baccata</i> | black<br>huckleberry | 83            |                           | 29                   | 93            | 79              |              |                     | 20                  | 76               |                         | 45              |
| <i>Corylus<br/>cornuta</i>     | beaked<br>hazelnut   | 38            |                           | 41                   | 65            | 44              |              | 52                  | 11                  |                  |                         |                 |
| <i>Viburnum<br/>dentatum</i>   | viburnum             | 35            | 29                        | 55                   | 65            | 75              | 68           | 70                  | 11                  |                  |                         |                 |
| <i>Clethra<br/>alnifolia</i>   | sweet<br>pepperbush  | 33            |                           | 39                   |               |                 |              |                     |                     |                  |                         |                 |
| <i>Smilax<br/>rotundifolia</i> | greenbriar           | 23            | 14                        | 31                   |               |                 |              |                     |                     |                  |                         |                 |
| <i>Pteridium<br/>aquilinum</i> | bracken fern         | 15            |                           |                      | 14            |                 |              |                     |                     |                  |                         |                 |

|                                   |                           |    |    |    |    |    |    |    |    |    |     |    |
|-----------------------------------|---------------------------|----|----|----|----|----|----|----|----|----|-----|----|
| <i>Morella caroliniensis</i>      | bayberry                  | 13 | 83 | 53 | 19 | 12 | 17 | 61 | 62 | 45 |     | 43 |
| <i>Vaccinium spp.</i>             | unidentified<br>vaccinium | 12 |    |    | 14 |    |    |    |    |    |     |    |
| <i>Vitis labrusca</i>             | fox grape                 | 10 | 71 |    |    | 11 | 21 |    |    |    | 55  |    |
| <i>Toxicodendron radicans</i>     | poison ivy                |    | 23 |    |    |    | 64 | 39 | 21 |    |     | 20 |
| <i>Parthenocissus cinquefolia</i> | Virginia creeper          |    | 20 | 14 |    | 20 | 70 | 24 |    |    |     |    |
| <i>Prunus serotina</i>            | black cherry              |    | 11 | 16 |    | 17 | 75 | 39 | 11 | 28 |     | 15 |
| <i>(many species)</i>             | grass/forbs               |    | 54 | 31 | 21 | 30 | 23 | 36 | 22 | 16 | 100 | 78 |
| <i>Ligustrum spp.</i>             | privet                    |    | 14 |    |    |    |    |    |    |    |     |    |
| <i>Juniperus virginiana</i>       | juniper, red cedar        |    | 20 |    |    |    |    |    |    |    |     |    |

|                                    |                           |  |    |    |  |    |    |  |    |    |  |  |
|------------------------------------|---------------------------|--|----|----|--|----|----|--|----|----|--|--|
| <i>Lonicera<br/>mackii</i>         | bush<br>honeysuckle       |  | 40 |    |  |    | 21 |  |    |    |  |  |
| <i>Amelanchier<br/>spp.</i>        | shadbush,<br>serviceberry |  |    | 12 |  |    |    |  |    |    |  |  |
| <i>Quercus<br/>alba</i>            | white oak                 |  |    | 12 |  | 23 |    |  |    |    |  |  |
| <i>Sassafras<br/>albidum</i>       | sassafras                 |  |    | 10 |  | 15 |    |  |    |    |  |  |
| <i>Pinus<br/>rigida</i>            | pitch pine                |  |    |    |  |    | 11 |  | 33 |    |  |  |
| <i>Arctostaphylos<br/>uva-ursi</i> | red<br>bearberry          |  |    |    |  |    |    |  | 51 | 47 |  |  |
