# Supplementary material for: Tick Densities and Infection Prevalence on Coastal Islands in Massachusetts, USA: Establishing a Baseline
Source: MDPI journal article supplement (doi:10.3390/insects14070628), 2023-07-12
Supplement: s1 [file s1]

**Figure S3.** Representative photos of *Ixodes dentatus* vs. *Ixodes scapularis* nymphs showing morphological similarity between species.

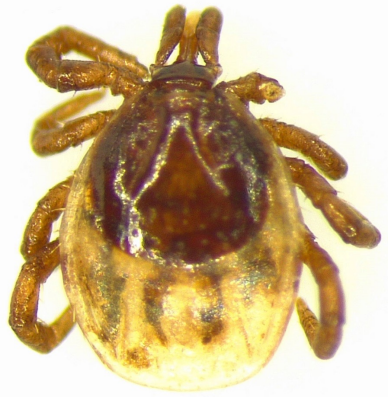

**I. dentatus** FT-24297

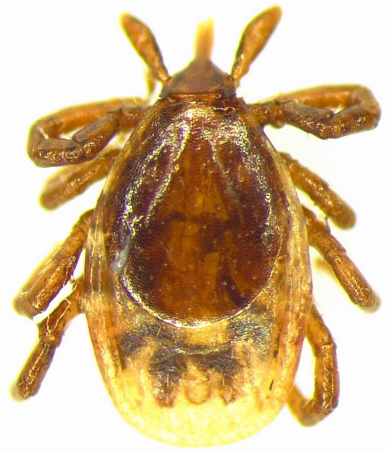

**I. scapularis** FT-24300

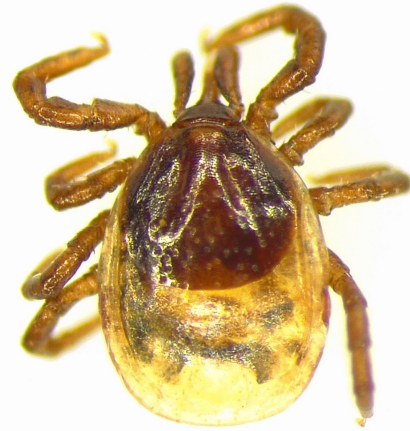

**I. dentatus** FT-24320

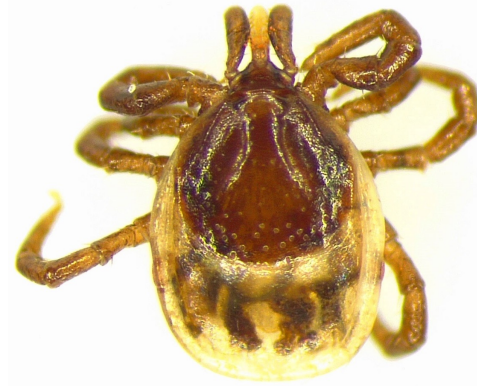

**I. dentatus** FT-24430

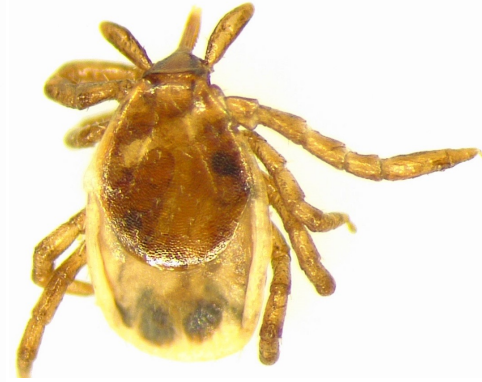

**I. scapularis** FT-24316

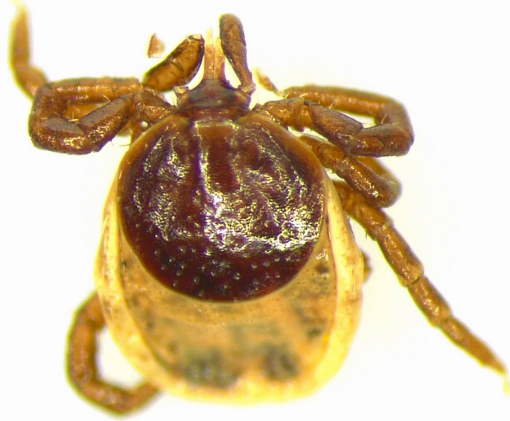

**I. dentatus** FT-24757

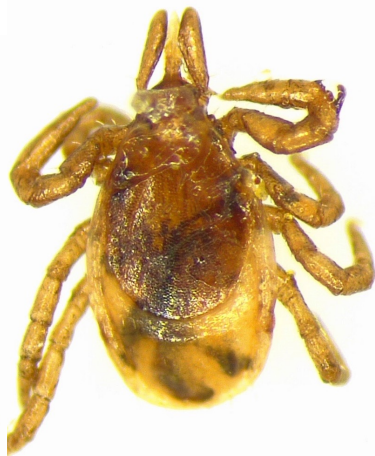

**I. scapularis** FT-24318

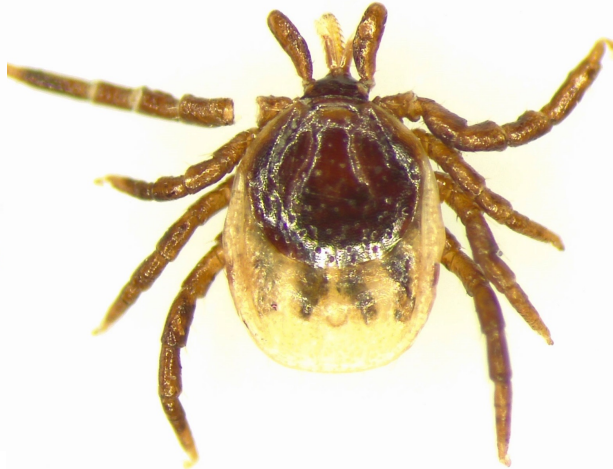

**I. dentatus** FT-24893

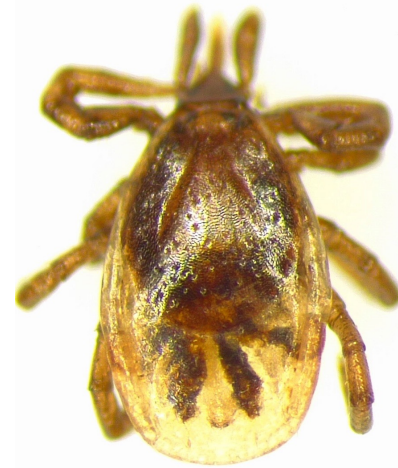

**I. scapularis** FT-24321

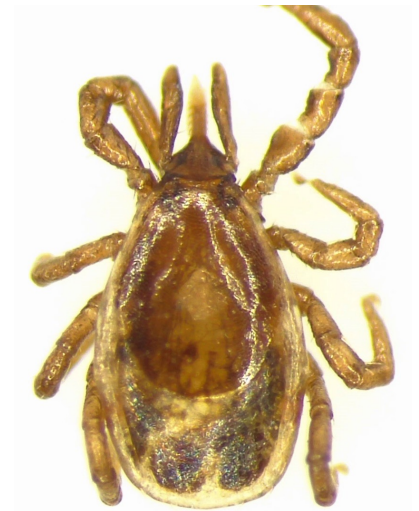

**I. scapularis** FT-24800
