# Supplementary material for: Tick Densities and Infection Prevalence on Coastal Islands in Massachusetts, USA: Establishing a Baseline
Source: MDPI journal article supplement (doi:10.3390/insects14070628), 2023-07-12

Figure S2. Frequency of tree canopy, high shrubs, and no shade along trails sampled at each site, based on 33-111 sample points per site. Order of presentation for each site as in Figure 2 showing tick densities. Frequencies of tree and shrub species at each site are listed in Supplemental Table 1.

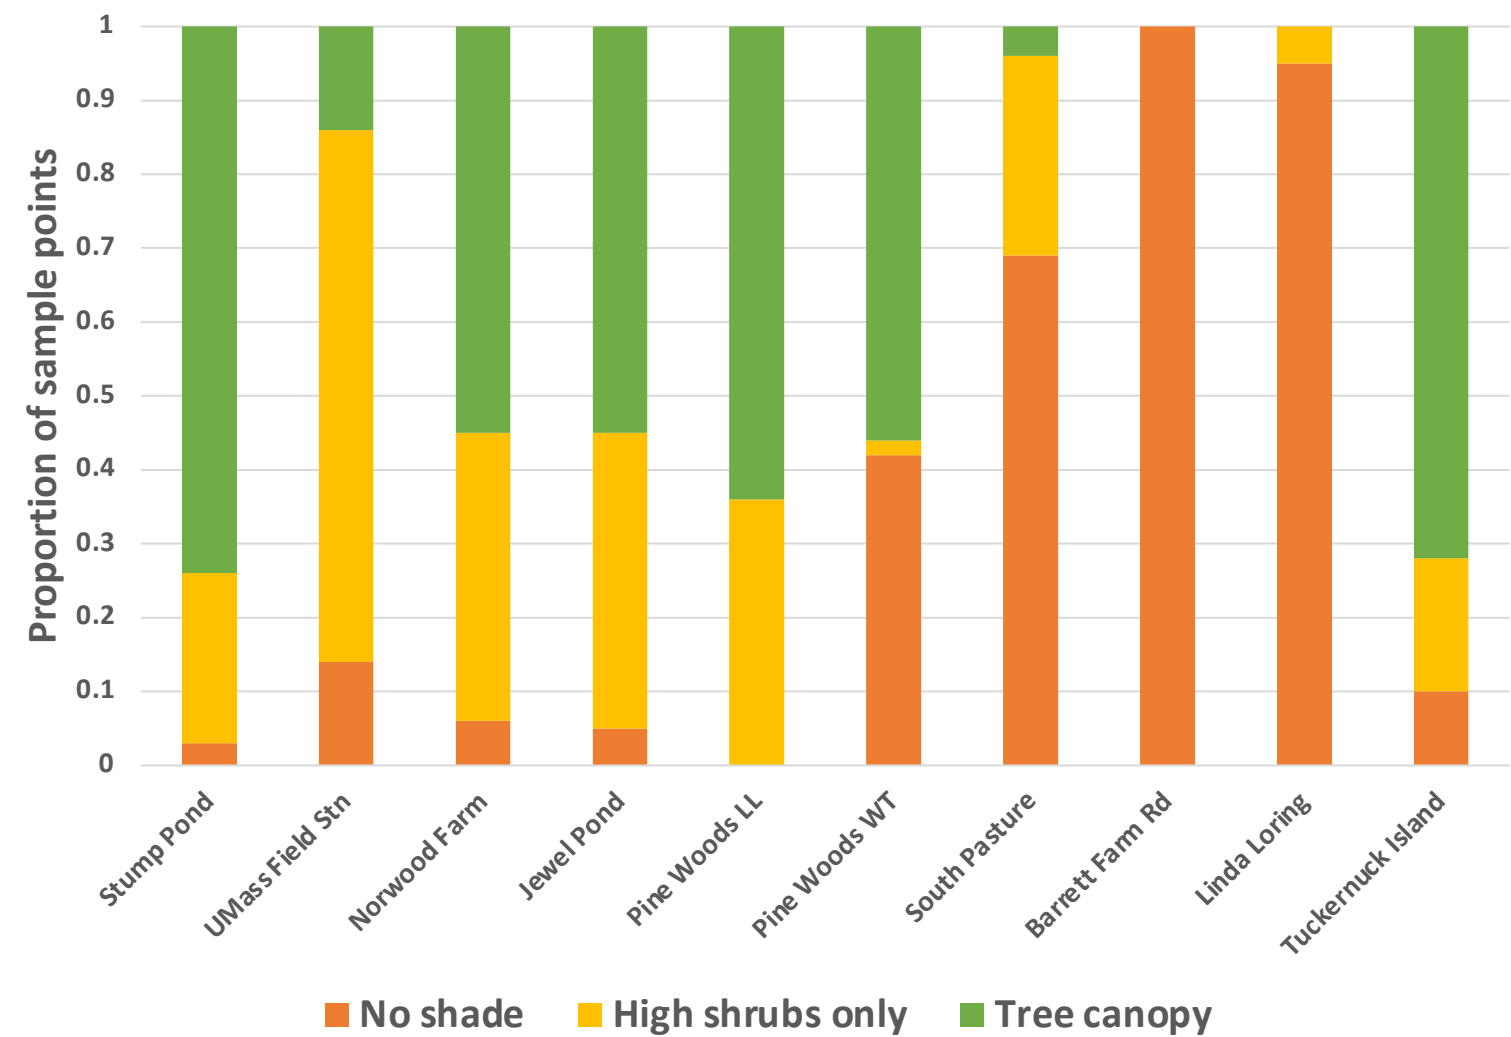

Supplement: s1 [file s1]
