# Supplementary material for: Tick Densities and Infection Prevalence on Coastal Islands in Massachusetts, USA: Establishing a Baseline
Source: MDPI journal article supplement (doi:10.3390/insects14070628), 2023-07-12
Supplement: s1 [file s1]

**Table S1.** Primers and probes used in DNA analyses for tick species identification and pathogens.

| Target                          | Primer or Probe Names   | Primer or Probe Sequences           |
|---------------------------------|-------------------------|-------------------------------------|
| Tick internal control           | HardTick_18S_F1         | AATGATTTAGTGAGGTCTTCGGACC           |
|                                 | HardTick_18S_R1         | TGTTACGACTTTTACTTCCTCTAAATGATC      |
|                                 | HardTick_18S_P1_FAM     | TCATCTTTCCAACACACCGGCGCAACC         |
| Ixodes scapularis               | I_scapularis_ITS_F1     | TTTCTTTGAGCAAATGCACGAGTG            |
|                                 | I_scapularis_ITS_R1     | GATTTTCCACAAACGGTATCCATCG           |
|                                 | I_scapularis_ITS_HEX_P1 | CGCTTAACCAGTCCTCCTCCTACGAGTT        |
| Ixodes dentatus                 | I_dentatus_F2           | TCTTGGCGTGGATGTTGTTTCG              |
|                                 | I_dentatus_R2           | GAAGGGTGTGCAAATCAACGC               |
|                                 | I_dentatus_FAM_P2       | AGAAAGCTTCTGGGATGGAGTGACGGA         |
| Borrelia genus                  | Borrelia_Genus_F3       | GCTTCGCTTGTAGATGAGTCTGC             |
|                                 | Borrelia_Genus_R3       | CCGTAGGAGTCTGGACCGTATC              |
|                                 | Borrelia_Genus_P3_705   | TCCAGTGTGACCGTTCACCCTCTCAGGC        |
| Borrelia burgdorferi Sensu Lato | BBSL_LNA_F1             | ATAGGTCTAATATTAGCCTTAATAGCAT        |
|                                 | BBSL_LNA_R1             | AGATCGTACTTGCCGTCTT                 |
|                                 | BBSL_LNA_P1_FAM         | aagc+Aaa+Atgtt+Agc+Agccttga         |
| Borrelia miyamotoi              | BMI_F1                  | AGACATAGTTCTAACAAAGGACAATATTCC      |
|                                 | BMI_R1                  | AGTTCAGTTAGTGTGAAGTCAGTAGC          |
|                                 | miyamotoi-GX-P_HEX      | TGCACGACCCAGAAATTGACACAACCACAA      |
| Borrelia mayonii                | B_mayonii_ospC_F        | TTGGTTGCATCCATAGATGAACTTG           |
|                                 | B_mayonii_ospC_R        | CGGTTGATATTGTATAGATTCTGATAGC        |
|                                 | B_mayonii_ospC_P_Cy5    | CCATTCTTACCTGCTTCATCCCCAACCATTATTTT |
| Babesia microti                 | B-microti-F             | GATTTGGAACCTGGCACCATG               |
|                                 | B-microti-R             | AATGACCCTTAGCCCAATTATTTCC           |
|                                 | B-microti_P_FAM         | ATCTGGCCCATACGGTGAATTGTTTCGC        |
| Anaplasma                       | Anaplasma_F             | ATGGAAGGTAGTGTTGGTTATGGTATT         |
|                                 | Anaplasma_R             | TTGGTCTTGAAGCGCTCGTA                |

|                            |                 |                                              |
|----------------------------|-----------------|----------------------------------------------|
|                            | Anaplasma_P_HEX | TGGTGCCAGGGTTGAGCTTGAGATTG                   |
| Ehrlichia muris-Like Agent | EMLA_F          | TACCTAATTCTTCTCAAGAGATTCAGTTG                |
|                            | EMLA_R          | ATGATGATACTGCGAACAACTATAAGAG                 |
|                            | EMLA_P_Cy5      | ATATTGATAAAAAGAGTCAGTGTTGATCCGTATGAGTTAGGGTT |
